# Supplementary material
Source: PubMed Central journal article supplement (PMC4195561)
Supplement: supp_mcu150_mcu150supp.pdf [file supp_mcu150_mcu150supp.pdf]

## SUPPLEMENTARY DATA

Table S1. Monosaccharide composition of pectin samples (mol % total sugars) and yields (weight %).

| Pectin Samples | GalA         | Rha         | Ara          | Gal         | GalA / Rha | (Ara+Gal)/Rha | Yield |
|----------------|--------------|-------------|--------------|-------------|------------|---------------|-------|
| <b>MN</b>      |              |             |              |             |            |               |       |
| Orange         | 81.71 ± 0.43 | 2.18 ± 0.09 | 9.19 ± 0.43  | 6.94 ± 0.09 | 37.6       | 7.4           | 90.7  |
| Lemon          | 87.36 ± 0.81 | 1.83 ± 0.10 | 6.07 ± 0.54  | 4.75 ± 0.37 | 47.8       | 5.9           | 89.6  |
| Lime           | 87.13 ± 1.34 | 1.81 ± 0.19 | 8.55 ± 0.81  | 2.53 ± 0.33 | 48.6       | 6.1           | 92.6  |
| Grapefruit     | 87.33 ± 0.78 | 2.69 ± 0.02 | 6.36 ± 0.50  | 3.63 ± 0.30 | 32.5       | 3.7           | 92.7  |
| <b>HN</b>      |              |             |              |             |            |               |       |
| Orange         | 86.23 ± 2.81 | 2.89 ± 0.26 | 2.19 ± 0.68  | 8.69 ± 2.09 | 29.9       | 3.8           | 92.1  |
| Lemon          | 91.26 ± 0.56 | 1.86 ± 0.10 | 1.23 ± 0.03  | 5.65 ± 0.37 | 49.1       | 3.7           | 96.3  |
| Lime           | 92.23 ± 2.18 | 2.75 ± 0.46 | 1.79 ± 0.43  | 3.24 ± 0.94 | 34.1       | 1.8           | 90.8  |
| Grapefruit     | 89.49 ± 4.48 | 3.15 ± 0.16 | 1.49 ± 0.08  | 4.64 ± 0.23 | 28.4       | 1.9           | 95.1  |
| <b>MO</b>      |              |             |              |             |            |               |       |
| Orange         | 81.70 ± 0.61 | 1.78 ± 0.01 | 12.68 ± 0.54 | 3.85 ± 0.06 | 46.0       | 9.3           | 85.3  |
| Lemon          | 82.78 ± 2.05 | 1.85 ± 0.05 | 12.20 ± 1.65 | 3.18 ± 0.35 | 44.9       | 8.3           | 87.2  |
| Lime           | 83.30 ± 0.11 | 1.72 ± 0.20 | 12.88 ± 0.31 | 2.10 ± 0.01 | 48.7       | 8.8           | 86.0  |
| Grapefruit     | 85.14 ± 0.81 | 2.08 ± 0.11 | 10.20 ± 0.62 | 2.59 ± 0.31 | 41.0       | 6.2           | 88.3  |
| <b>HO</b>      |              |             |              |             |            |               |       |
| Orange         | 82.28 ± 0.01 | 1.86 ± 0.11 | 11.13 ± 0.10 | 4.73 ± 0.04 | 42.5       | 8.1           | 92.9  |
| Lemon          | 87.98 ± 0.71 | 1.35 ± 0.05 | 7.79 ± 0.41  | 2.88 ± 0.25 | 63.2       | 8.0           | 93.9  |
| Lime           | 85.50 ± 0.15 | 1.46 ± 0.13 | 10.87 ± 0.28 | 2.17 ± 0.00 | 55.3       | 8.3           | 93.2  |
| Grapefruit     | 84.54 ± 0.61 | 2.36 ± 0.11 | 10.27 ± 0.35 | 2.83 ± 0.14 | 37.3       | 5.6           | 92.0  |

Values are the average of duplicates ( $\pm$  s.d.)

Man  $\leq$  6.09 mol %; Glc  $\leq$  2.88 mol %; Xyl  $\leq$  0.98 mol %; Fuc  $\leq$  0.25 mol %

Table S2. Macromolecular features of extracted pectin samples.

|            | $M_w$ (kDa)    | PDI         | IV (dL/g)    |
|------------|----------------|-------------|--------------|
| <b>MN</b>  |                |             |              |
| Orange     | 244.79 ± 9.40  | 1.82 ± 0.18 | 6.19 ± 0.04  |
| Lemon      | 223.18 ± 0.39  | 1.73 ± 0.06 | 7.73 ± 0.00  |
| Lime       | 218.00 ± 13.98 | 1.58 ± 0.10 | 8.07 ± 0.33  |
| Grapefruit | 204.79 ± 3.40  | 1.94 ± 0.04 | 5.86 ± 0.06  |
| <b>HN</b>  |                |             |              |
| Orange     | 186.39 ± 5.15  | 2.00 ± 0.05 | 4.35 ± 0.04  |
| Lemon      | 159.58 ± 1.19  | 1.84 ± 0.06 | 5.46 ± 0.04  |
| Lime       | 146.06 ± 2.98  | 1.60 ± 0.03 | 6.14 ± 0.08  |
| Grapefruit | 149.05 ± 0.43  | 2.06 ± 0.00 | 4.05 ± 0.00  |
| <b>MO</b>  |                |             |              |
| Orange     | 414.64 ± 3.99  | 1.30 ± 0.08 | 7.44 ± 0.09  |
| Lemon      | 393.38 ± 11.31 | 1.33 ± 0.05 | 8.99 ± 0.25  |
| Lime       | 372.06 ± 3.51  | 1.29 ± 0.11 | 10.57 ± 0.20 |
| Grapefruit | 286.76 ± 11.97 | 1.56 ± 0.12 | 7.56 ± 0.53  |
| <b>HO</b>  |                |             |              |
| Orange     | 236.50 ± 14.70 | 1.64 ± 0.02 | 6.43 ± 0.45  |
| Lemon      | 242.82 ± 20.43 | 1.40 ± 0.03 | 7.80 ± 0.44  |
| Lime       | 236.50 ± 14.70 | 1.48 ± 0.02 | 8.46 ± 0.22  |
| Grapefruit | 206.53 ± 0.28  | 1.72 ± 0.05 | 6.18 ± 0.05  |

$M_w$ , weight-average molecular weight

PDI, polydispersity index ( $M_w/M_n$ );  $M_n$ , number-average molecular weight

IV, Intrinsic viscosity

Values are the average of two replicates ( $\pm$  s.d.).

Table S3. Monosaccharide composition of HG domains (mol % total sugars).

|            | GalA          | Rha          | Ara          | Xyl          | Man          | Gal          | Glc          |
|------------|---------------|--------------|--------------|--------------|--------------|--------------|--------------|
| <b>MN</b>  |               |              |              |              |              |              |              |
| orange     | 99.90 ± 0.003 | 0.03 ± 0.001 | 0.02 ± 0.002 | 0.02 ± 0.001 | 0.00 ± 0.002 | 0.02 ± 0.000 | 0.01 ± 0.000 |
| lemon      | 99.89 ± 0.019 | 0.03 ± 0.000 | 0.02 ± 0.005 | 0.01 ± 0.003 | 0.00 ± 0.003 | 0.03 ± 0.018 | 0.01 ± 0.001 |
| lime       | 99.93 ± 0.011 | 0.03 ± 0.002 | 0.02 ± 0.002 | 0.00 ± 0.007 | 0.00 ± 0.000 | 0.01 ± 0.001 | 0.00 ± 0.005 |
| grapefruit | 99.91 ± 0.004 | 0.03 ± 0.001 | 0.02 ± 0.001 | 0.02 ± 0.004 | 0.00 ± 0.000 | 0.01 ± 0.000 | 0.01 ± 0.000 |
| <b>MO</b>  |               |              |              |              |              |              |              |
| orange     | 98.51 ± 1.868 | 0.04 ± 0.012 | 0.28 ± 0.310 | 0.60 ± 0.821 | 0.25 ± 0.348 | 0.23 ± 0.297 | 0.09 ± 0.080 |
| lemon      | 99.78 ± 0.195 | 0.08 ± 0.079 | 0.04 ± 0.033 | 0.04 ± 0.036 | 0.00 ± 0.002 | 0.04 ± 0.035 | 0.02 ± 0.015 |
| lime       | 99.92 ± 0.007 | 0.03 ± 0.005 | 0.01 ± 0.003 | 0.01 ± 0.003 | 0.00 ± 0.000 | 0.01 ± 0.001 | 0.01 ± 0.000 |
| grapefruit | 99.91 ± 0.011 | 0.04 ± 0.008 | 0.02 ± 0.004 | 0.01 ± 0.001 | 0.00 ± 0.000 | 0.01 ± 0.003 | 0.01 ± 0.003 |

Values are the average of duplicates (± s.d.)

Table S4. Macromolecular features of isolated HG domains.

|            | Mw (kDa)     | PDI         | IV (dL/g)   |
|------------|--------------|-------------|-------------|
| <b>MN</b>  |              |             |             |
| Orange     | 22.98 ± 2.09 | 1.35 ± 0.06 | 0.93 ± 0.09 |
| Lemon      | 23.13 ± 0.65 | 1.36 ± 0.01 | 0.93 ± 0.02 |
| Lime       | 26.51 ± 0.14 | 1.34 ± 0.04 | 1.10 ± 0.00 |
| Grapefruit | 22.00 ± 0.21 | 1.35 ± 0.00 | 0.87 ± 0.00 |
| <b>HN</b>  |              |             |             |
| Orange     | 23.86 ± 1.95 | 1.63 ± 0.04 | 1.03 ± 0.08 |
| Lemon      | 20.06 ± 1.07 | 1.53 ± 0.01 | 0.87 ± 0.06 |
| Lime       | 17.07 ± 0.03 | 1.40 ± 0.00 | 0.70 ± 0.00 |
| Grapefruit | 24.13 ± 1.16 | 1.63 ± 0.03 | 1.05 ± 0.05 |
| <b>MO</b>  |              |             |             |
| Orange     | 29.88 ± 1.85 | 1.45 ± 0.03 | 1.02 ± 0.01 |
| Lemon      | 37.67 ± 4.09 | 1.52 ± 0.10 | 1.16 ± 0.02 |
| Lime       | 32.81 ± 0.39 | 1.52 ± 0.04 | 1.16 ± 0.08 |
| Grapefruit | 30.10 ± 1.33 | 1.46 ± 0.01 | 1.07 ± 0.06 |
| <b>HO</b>  |              |             |             |
| Orange     | 24.35 ± 4.94 | 1.64 ± 0.15 | 1.10 ± 0.26 |
| Lemon      | 19.50 ± 1.45 | 1.44 ± 0.08 | 0.83 ± 0.06 |
| Lime       | 21.23 ± 0.81 | 1.55 ± 0.04 | 0.94 ± 0.03 |
| Grapefruit | 23.12 ± 1.16 | 1.60 ± 0.08 | 0.98 ± 0.05 |

$M_w$ , weight-average molecular weight

PDI, polydispersity index ( $M_w/M_n$ );  $M_n$ , number-average molecular weight

IV, Intrinsic viscosity

Values are the average of two replicates ( $\pm$  s.d.).

Table S5. Amount of  $\text{Ca}^{2+}$  present in the different citrus peels ( $\text{mg g}^{-1}$ ) and molar ratio between the amount of oxalic acid and the quantity of  $\text{Ca}^{2+}$  in harsh oxalic acid (HO) and mild oxalic acid (MO) extractions.

| Peel       | mg $\text{Ca}^{2+}$ /g peel | OxA/ $\text{Ca}^{2+}$ molar ratio |      |
|------------|-----------------------------|-----------------------------------|------|
|            |                             | HO                                | MO   |
| Lime       | 12.31                       | 1.03                              | 2.62 |
| Grapefruit | 11.84                       | 1.07                              | 2.73 |
| Lemon      | 7.52                        | 1.27                              | 4.29 |
| Orange     | 6.37                        | 1.50                              | 5.07 |
